# Supplementary material for: Genotype-specific responses to in vitro drought stress in myrtle (Myrtus communis L.): integrating machine learning techniques
Source: PeerJ. 2024 Oct 7;12:e18081. doi: 10.7717/peerj.18081 (PMC11466237; doi:10.7717/peerj.18081)
Supplement: Supplemental Information 1 [file peerj-12-18081-s001.xlsx]

## Sheet: Myrtle In vitro drougt raw data
Genotype	PEG	Repetition	Micropropagation rate	Plant length (cm)	Plant length (cm) in rooting medium	Number of roots	Root length (cm)
White-fruited 1	0	1	10	4.2	4	2	2.5
White-fruited 1	0	1	7	3.7	3.5	3	2.7
White-fruited 1	0	1	11	4.2	4.4	2	2.8
White-fruited 1	0	1	12	3.6	4.1	4	2.5
White-fruited 1	0	1	8	4.8	4.2	2	2.4
White-fruited 1	0	1	7	4.6	4.3	3	2.9
White-fruited 1	0	1	10	4.7	4.4	3	3.2
White-fruited 1	0	1	11	3.8	4.1	4	3.1
White-fruited 1	0	1	14	3.9	3.8	2	3.1
White-fruited 1	0	1	12	3.6	3.7	2	2.5
White-fruited 1	0.02	1	10	3.9	3.3	3	3.1
White-fruited 1	0.02	1	8	3.9	3.5	4	2.5
White-fruited 1	0.02	1	7	3.1	3	2	2.9
White-fruited 1	0.02	1	9	3.7	3.5	3	3.2
White-fruited 1	0.02	1	8	4.1	4.3	4	2.6
White-fruited 1	0.02	1	11	3.7	4.1	5	2.5
White-fruited 1	0.02	1	9	3.9	3.5	4	3.1
White-fruited 1	0.02	1	8	3.5	4.1	2	3.5
White-fruited 1	0.02	1	10	4.2	4.1	5	3
White-fruited 1	0.02	1	7	3.6	3.5	4	3.1
White-fruited 1	0.04	1	8	3.6	3.2	3	3.2
White-fruited 1	0.04	1	10	3.5	3.3	2	2.7
White-fruited 1	0.04	1	8	3.1	3.5	3	3.5
White-fruited 1	0.04	1	7	2.8	3.1	4	2.9
White-fruited 1	0.04	1	6	3.8	3.5	5	2.7
White-fruited 1	0.04	1	7	2.5	2.6	4	2.6
White-fruited 1	0.04	1	6	3.6	3.1	4	3.5
White-fruited 1	0.04	1	4	3.1	2.9	4	3.1
White-fruited 1	0.04	1	9	3.1	3.2	4	2.5
White-fruited 1	0.04	1	7	3.5	3.1	4	3.6
White-fruited 1	0.06	1	6	2.5	2.2	3	3.5
White-fruited 1	0.06	1	5	3.5	3.4	5	3.7
White-fruited 1	0.06	1	4	2.6	2.9	3	3.5
White-fruited 1	0.06	1	4	2.9	2.4	2	3.1
White-fruited 1	0.06	1	7	2.5	2.1	3	3.2
White-fruited 1	0.06	1	4	3.1	2.5	4	2.5
White-fruited 1	0.06	1	5	3.2	2.1	6	3.1
White-fruited 1	0.06	1	7	2.9	2.3	4	3.5
White-fruited 1	0.06	1	6	3.5	2.9	4	2.9
White-fruited 1	0.06	1	5	3.6	3.1	4	3.6
White-fruited 2	0	1	7	3.9	3.5	4	2.4
White-fruited 2	0	1	11	3.8	3.6	4	2.8
White-fruited 2	0	1	12	4.1	3.9	5	2.8
White-fruited 2	0	1	13	3.8	3.5	4	2.8
White-fruited 2	0	1	7	5.1	4.5	3	2.6
White-fruited 2	0	1	9	4.1	3.9	3	2.5
White-fruited 2	0	1	9	5.2	3.8	4	2.9
White-fruited 2	0	1	13	4.1	3.5	2	2.7
White-fruited 2	0	1	7	4.1	3.9	3	2.4
White-fruited 2	0	1	11	3.9	3.5	2	2.1
White-fruited 2	0.02	1	9	3.7	3.4	2	3
White-fruited 2	0.02	1	9	3.8	3.5	3	2.1
White-fruited 2	0.02	1	8	3.5	3.3	3	2.4
White-fruited 2	0.02	1	10	3.6	3.5	4	2.6
White-fruited 2	0.02	1	8	3.9	3.5	2	2.1
White-fruited 2	0.02	1	10	3.8	3.6	5	2.1
White-fruited 2	0.02	1	11	3.7	3.1	3	3
White-fruited 2	0.02	1	9	3.6	3.8	2	3.7
White-fruited 2	0.02	1	8	3.9	3.5	3	3.2
White-fruited 2	0.02	1	9	3.8	3.2	4	2.9
White-fruited 2	0.04	1	8	3.8	3.4	3	3.1
White-fruited 2	0.04	1	9	3.4	3.1	3	3.1
White-fruited 2	0.04	1	9	3.5	3.2	4	3.2
White-fruited 2	0.04	1	8	3.1	2.9	5	2.5
White-fruited 2	0.04	1	8	3.3	2.4	4	3.1
White-fruited 2	0.04	1	6	3.1	3.3	3	2.9
White-fruited 2	0.04	1	7	3.1	2.7	4	3
White-fruited 2	0.04	1	6	3.2	3.1	3	3
White-fruited 2	0.04	1	8	2.9	2.5	4	2.7
White-fruited 2	0.04	1	9	3.2	3.1	5	3.1
White-fruited 2	0.06	1	8	3.1	2.9	5	3.2
White-fruited 2	0.06	1	5	3.2	3.5	4	3.9
White-fruited 2	0.06	1	6	2.7	2.4	3	3.7
White-fruited 2	0.06	1	4	3.4	2.6	5	2.9
White-fruited 2	0.06	1	6	2.7	2.5	3	3.5
White-fruited 2	0.06	1	5	2.6	3	4	3.7
White-fruited 2	0.06	1	5	2.9	2.5	4	2.9
White-fruited 2	0.06	1	6	2.7	2.4	3	3.1
White-fruited 2	0.06	1	5	2.9	2.1	2	3.2
White-fruited 2	0.06	1	5	2.9	2.2	3	3.9
Black-fruited 1	0	1	10	5.2	4.9	3	3
Black-fruited 1	0	1	7	4.1	3.9	2	3.1
Black-fruited 1	0	1	12	4.3	4.1	3	2.5
Black-fruited 1	0	1	12	4.7	4.5	3	2.7
Black-fruited 1	0	1	10	4.3	4.1	3	2.5
Black-fruited 1	0	1	8	4.8	4.2	4	3.1
Black-fruited 1	0	1	11	4.5	4.1	4	3.1
Black-fruited 1	0	1	10	4.1	3.5	3	3.5
Black-fruited 1	0	1	12	4.2	4.1	3	3.5
Black-fruited 1	0	1	11	3.9	3.5	2	3
Black-fruited 1	0.02	1	11	4.1	3.4	2	2.8
Black-fruited 1	0.02	1	9	4.2	4.1	3	3
Black-fruited 1	0.02	1	8	3.5	3	3	3.1
Black-fruited 1	0.02	1	10	3.7	3.2	4	3.5
Black-fruited 1	0.02	1	9	4.1	3.4	3	2.5
Black-fruited 1	0.02	1	12	4.1	3.6	4	2.4
Black-fruited 1	0.02	1	10	4.5	3.5	3	3.5
Black-fruited 1	0.02	1	9	4.1	3.7	4	3.6
Black-fruited 1	0.02	1	12	3.9	3.5	4	2.5
Black-fruited 1	0.02	1	8	3.9	3.4	3	3.5
Black-fruited 1	0.04	1	9	3.7	3.4	3	3.5
Black-fruited 1	0.04	1	10	3.9	3.2	4	3.1
Black-fruited 1	0.04	1	11	3.5	3.1	2	3.7
Black-fruited 1	0.04	1	7	3.5	3.3	3	3.1
Black-fruited 1	0.04	1	8	3.6	3.1	4	2.5
Black-fruited 1	0.04	1	7	3.7	2.9	4	2.9
Black-fruited 1	0.04	1	7	3.7	3.1	3	3.4
Black-fruited 1	0.04	1	8	3.5	3.4	4	3.5
Black-fruited 1	0.04	1	6	3.2	3.1	3	3
Black-fruited 1	0.04	1	8	3.1	3.5	5	3
Black-fruited 1	0.06	1	7	3.6	3.2	4	3.1
Black-fruited 1	0.06	1	4	3.4	3.1	5	3.5
Black-fruited 1	0.06	1	6	3.7	3.2	4	2.9
Black-fruited 1	0.06	1	5	3.4	3.1	3	3.5
Black-fruited 1	0.06	1	5	2.9	2.5	4	3.6
Black-fruited 1	0.06	1	6	3.2	3.1	3	3.7
Black-fruited 1	0.06	1	7	2.8	2.9	3	3.5
Black-fruited 1	0.06	1	8	2.4	2.5	4	4
Black-fruited 1	0.06	1	8	3.2	3.1	3	3.5
Black-fruited 1	0.06	1	6	4.2	4	5	3.7
Black-fruited 2	0	1	9	4.3	3.9	3	2.5
Black-fruited 2	0	1	7	3.7	3.5	3	2.9
Black-fruited 2	0	1	15	3.8	3.1	3	2.9
Black-fruited 2	0	1	11	3.5	3.2	2	2.7
Black-fruited 2	0	1	9	3.9	3.5	4	2.5
Black-fruited 2	0	1	10	4.5	3.1	2	2.9
Black-fruited 2	0	1	12	4.9	3.5	2	3.1
Black-fruited 2	0	1	9	5.6	4.1	2	3.2
Black-fruited 2	0	1	9	5.4	3.9	3	2.9
Black-fruited 2	0	1	12	5.1	4.9	3	2.5
Black-fruited 2	0.02	1	10	4.1	3.9	2	3.1
Black-fruited 2	0.02	1	11	3.9	3.4	3	2.5
Black-fruited 2	0.02	1	7	3.8	3.5	4	2.6
Black-fruited 2	0.02	1	8	3.7	3.2	3	2.7
Black-fruited 2	0.02	1	9	4.1	3.5	3	2.5
Black-fruited 2	0.02	1	12	4.2	3.6	4	2.5
Black-fruited 2	0.02	1	13	3.9	3.4	4	3.1
Black-fruited 2	0.02	1	11	3.8	3.6	3	3.7
Black-fruited 2	0.02	1	7	4.5	3.9	2	3.5
Black-fruited 2	0.02	1	8	3.9	3.5	3	3.1
Black-fruited 2	0.04	1	9	4.1	3.4	4	3.2
Black-fruited 2	0.04	1	9	3.6	3.2	3	3.3
Black-fruited 2	0.04	1	10	3.4	3.1	3	3.3
Black-fruited 2	0.04	1	7	3.6	3.1	4	3
Black-fruited 2	0.04	1	10	3.5	2.9	3	3.5
Black-fruited 2	0.04	1	8	3.4	3.1	3	3.1
Black-fruited 2	0.04	1	8	3.9	3.5	3	3.2
Black-fruited 2	0.04	1	7	3.4	3.1	4	3.3
Black-fruited 2	0.04	1	9	3.1	3.5	3	3.6
Black-fruited 2	0.04	1	8	3.2	3.1	4	3.5
Black-fruited 2	0.06	1	8	3.3	3.1	4	3.5
Black-fruited 2	0.06	1	6	2.9	2.5	4	4.1
Black-fruited 2	0.06	1	7	3.1	2.5	4	4.2
Black-fruited 2	0.06	1	6	3.3	2.5	4	3.5
Black-fruited 2	0.06	1	5	3.9	2.9	3	3.7
Black-fruited 2	0.06	1	8	2.2	2.4	4	3.9
Black-fruited 2	0.06	1	8	2.7	2.5	3	3.5
Black-fruited 2	0.06	1	9	2.9	2.4	4	3.5
Black-fruited 2	0.06	1	7	3.1	2.9	3	3.6
Black-fruited 2	0.06	1	8	3.5	2.7	4	4.2
White-fruited 1	0	2	11	3.9	2.4	3	2.4
White-fruited 1	0	2	8	3.8	3.5	2	2.5
White-fruited 1	0	2	10	4.5	3.9	2	2.6
White-fruited 1	0	2	13	3.9	3.5	3	2.7
White-fruited 1	0	2	9	3.8	3.7	3	2.8
White-fruited 1	0	2	8	4.1	3.9	2	3.1
White-fruited 1	0	2	9	4.3	3.5	2	3.1
White-fruited 1	0	2	10	4.8	4.1	3	3.5
White-fruited 1	0	2	8	4.3	4.2	3	2.5
White-fruited 1	0	2	16	4.1	3.8	3	2.7
White-fruited 1	0.02	2	12	3.5	3.2	2	3
White-fruited 1	0.02	2	9	4.1	3.4	3	2.8
White-fruited 1	0.02	2	6	3.5	3.1	3	2.8
White-fruited 1	0.02	2	11	3.6	3.5	2	3.1
White-fruited 1	0.02	2	12	3.9	3.4	3	3
White-fruited 1	0.02	2	10	3.8	3.5	4	2.4
White-fruited 1	0.02	2	7	3.5	3.4	5	2.5
White-fruited 1	0.02	2	11	3.9	3.5	3	3
White-fruited 1	0.02	2	11	3.7	3.4	4	2.5
White-fruited 1	0.02	2	8	4.1	3.5	4	3.5
White-fruited 1	0.04	2	7	3.5	3.1	4	3.5
White-fruited 1	0.04	2	9	3.7	3.6	3	2.5
White-fruited 1	0.04	2	8	3.5	3.1	4	3
White-fruited 1	0.04	2	8	3.1	2.9	3	3.1
White-fruited 1	0.04	2	7	3.2	3.1	4	3
White-fruited 1	0.04	2	6	3.3	3.1	4	2.8
White-fruited 1	0.04	2	6	2.9	2.5	3	3
White-fruited 1	0.04	2	5	2.8	2.4	4	3.5
White-fruited 1	0.04	2	7	3.2	2.1	5	3
White-fruited 1	0.04	2	6	3.1	2.7	5	3.9
White-fruited 1	0.06	2	5	3.1	2.8	4	4
White-fruited 1	0.06	2	6	2.9	2.5	4	3.8
White-fruited 1	0.06	2	5	2.5	2.6	3	3.5
White-fruited 1	0.06	2	3	2.9	2.7	3	3.3
White-fruited 1	0.06	2	5	2.6	2.4	3	3.2
White-fruited 1	0.06	2	3	3.2	3.1	4	3
White-fruited 1	0.06	2	4	3.1	2.5	3	3.5
White-fruited 1	0.06	2	5	2.8	2.4	5	3
White-fruited 1	0.06	2	7	2.9	2.1	4	3
White-fruited 1	0.06	2	6	2.8	2.4	5	3.5
White-fruited 2	0	2	8	4.1	3.5	4	2.1
White-fruited 2	0	2	10	4.5	3.7	5	2.5
White-fruited 2	0	2	9	4.3	3.9	4	2.6
White-fruited 2	0	2	9	3.9	3.7	3	2.4
White-fruited 2	0	2	9	4.1	3.1	2	3
White-fruited 2	0	2	11	4.9	3.5	2	2.1
White-fruited 2	0	2	12	4.4	4.1	3	2.5
White-fruited 2	0	2	11	4.3	4.1	2	2.9
White-fruited 2	0	2	8	3.9	3.5	3	2.6
White-fruited 2	0	2	9	4.4	3.1	3	2.5
White-fruited 2	0.02	2	8	3.9	3.5	2	2.9
White-fruited 2	0.02	2	10	3.5	3.2	2	2.2
White-fruited 2	0.02	2	7	3.3	3.1	1	2.5
White-fruited 2	0.02	2	9	3.2	2.9	4	2.7
White-fruited 2	0.02	2	8	3.5	2.7	3	2.2
White-fruited 2	0.02	2	9	4.1	3.5	4	2.3
White-fruited 2	0.02	2	13	4.3	3.7	4	3.2
White-fruited 2	0.02	2	7	3.9	3.5	3	3.5
White-fruited 2	0.02	2	9	4.4	3.4	4	3.5
White-fruited 2	0.02	2	7	3.9	3.5	2	3.1
White-fruited 2	0.04	2	7	2.9	2.5	4	3.3
White-fruited 2	0.04	2	8	3.6	3.1	4	3.2
White-fruited 2	0.04	2	11	3.7	3.5	3	3
White-fruited 2	0.04	2	9	3.5	3.1	4	2.6
White-fruited 2	0.04	2	6	3.4	3.2	3	2.9
White-fruited 2	0.04	2	7	2.9	2.5	2	2.6
White-fruited 2	0.04	2	6	3.2	2.9	3	2.9
White-fruited 2	0.04	2	5	3.1	2.4	2	2.8
White-fruited 2	0.04	2	7	2.8	2.5	4	2.8
White-fruited 2	0.04	2	8	2.9	2.5	4	3
White-fruited 2	0.06	2	7	2.4	2.1	4	3.1
White-fruited 2	0.06	2	6	3.6	3.1	3	4
White-fruited 2	0.06	2	9	3.1	2.5	2	3.9
White-fruited 2	0.06	2	3	3.2	2.4	4	3.5
White-fruited 2	0.06	2	4	3.1	2.6	3	3.7
White-fruited 2	0.06	2	3	2.9	2.1	3	3.6
White-fruited 2	0.06	2	3	3.2	2.4	3	3.2
White-fruited 2	0.06	2	4	2.9	2.5	4	3.5
White-fruited 2	0.06	2	4	2.9	2.5	3	3.4
White-fruited 2	0.06	2	4	2.5	2.1	4	3.9
Black-fruited 1	0	2	11	4.9	3.9	4	2.5
Black-fruited 1	0	2	15	4.8	4.1	3	3.1
Black-fruited 1	0	2	9	4.7	4.2	2	3.2
Black-fruited 1	0	2	14	4.4	4.1	2	3.1
Black-fruited 1	0	2	9	4.6	3.9	2	2.4
Black-fruited 1	0	2	10	4.9	3.5	2	2.4
Black-fruited 1	0	2	12	4.4	4.1	3	2.6
Black-fruited 1	0	2	9	4.5	4.1	1	3.7
Black-fruited 1	0	2	14	4.9	4.5	2	3.1
Black-fruited 1	0	2	13	5.1	4.6	3	3.2
Black-fruited 1	0.02	2	13	5.3	4.4	1	3.2
Black-fruited 1	0.02	2	10	4.1	3.5	2	2.8
Black-fruited 1	0.02	2	11	3.9	3.1	3	3.5
Black-fruited 1	0.02	2	10	3.5	3.7	4	3.3
Black-fruited 1	0.02	2	10	3.9	3.5	4	3.1
Black-fruited 1	0.02	2	9	3.8	3.6	3	3.2
Black-fruited 1	0.02	2	14	4.4	3.5	3	3
Black-fruited 1	0.02	2	15	3.7	3.2	3	3.2
Black-fruited 1	0.02	2	9	3.5	2.1	4	3.1
Black-fruited 1	0.02	2	7	4.1	3.9	4	3.2
Black-fruited 1	0.04	2	8	3.5	3.1	3	3.4
Black-fruited 1	0.04	2	9	3.5	3.2	4	2.8
Black-fruited 1	0.04	2	10	3.3	2.9	3	3.5
Black-fruited 1	0.04	2	8	3.4	2.8	4	3.5
Black-fruited 1	0.04	2	9	3.7	2.7	3	3
Black-fruited 1	0.04	2	8	3.6	3.1	4	3.6
Black-fruited 1	0.04	2	9	3.5	3.1	4	3.5
Black-fruited 1	0.04	2	7	3.4	3.1	3	3.2
Black-fruited 1	0.04	2	8	3.5	2.8	3	3.3
Black-fruited 1	0.04	2	7	3.5	2.7	4	3.3
Black-fruited 1	0.06	2	7	3.5	2.8	4	3.5
Black-fruited 1	0.06	2	6	3.6	2.9	4	4
Black-fruited 1	0.06	2	5	3.6	3.1	6	3.2
Black-fruited 1	0.06	2	6	3.2	2.4	4	4.1
Black-fruited 1	0.06	2	4	3.1	3.2	5	4.2
Black-fruited 1	0.06	2	7	3.1	2.4	4	3.5
Black-fruited 1	0.06	2	8	2.9	2.5	2	3.3
Black-fruited 1	0.06	2	5	3.4	2.1	5	3
Black-fruited 1	0.06	2	7	2.7	2.2	4	3
Black-fruited 1	0.06	2	7	2.5	2.1	6	3.2
Black-fruited 2	0	2	12	4.9	4.5	2	2
Black-fruited 2	0	2	9	4.1	3.5	2	2.5
Black-fruited 2	0	2	11	4.2	3.7	1	2.1
Black-fruited 2	0	2	14	3.9	3.5	3	2.9
Black-fruited 2	0	2	12	4.1	3.6	2	2.8
Black-fruited 2	0	2	13	4.5	3.7	1	2.4
Black-fruited 2	0	2	9	4.4	3.5	3	3.5
Black-fruited 2	0	2	14	4.3	3.6	1	2.1
Black-fruited 2	0	2	12	4.9	3.5	1	2
Black-fruited 2	0	2	9	5.6	4.1	2	2.1
Black-fruited 2	0.02	2	12	4.9	4.5	3	3.1
Black-fruited 2	0.02	2	10	4.5	3.5	2	2.9
Black-fruited 2	0.02	2	8	3.9	4.1	3	2.6
Black-fruited 2	0.02	2	9	3.9	3.5	3	2.8
Black-fruited 2	0.02	2	7	3.8	3.3	3	2.6
Black-fruited 2	0.02	2	11	4.1	3.9	3	2.5
Black-fruited 2	0.02	2	10	4.2	3.4	2	3
Black-fruited 2	0.02	2	12	3.9	3.1	4	3.5
Black-fruited 2	0.02	2	10	4.9	4.1	3	3.5
Black-fruited 2	0.02	2	10	4.1	3.5	4	3.1
Black-fruited 2	0.04	2	11	4.3	3.7	3	3.2
Black-fruited 2	0.04	2	8	3.9	3.6	4	3.5
Black-fruited 2	0.04	2	9	3.5	3.1	2	3.7
Black-fruited 2	0.04	2	8	3.7	3.5	3	3
Black-fruited 2	0.04	2	11	3.6	3.1	2	3.5
Black-fruited 2	0.04	2	7	3.5	3.2	2	3.3
Black-fruited 2	0.04	2	7	3.9	3	2	3.2
Black-fruited 2	0.04	2	8	3.6	3.2	3	3.1
Black-fruited 2	0.04	2	8	3.4	2.9	2	3.6
Black-fruited 2	0.04	2	9	3.3	2.7	3	3.5
Black-fruited 2	0.06	2	7	3.1	2.6	3	3.6
Black-fruited 2	0.06	2	8	3.2	2.5	3	4.1
Black-fruited 2	0.06	2	6	3.5	2.7	3	4.2
Black-fruited 2	0.06	2	5	3.6	2.1	3	3.8
Black-fruited 2	0.06	2	7	3.5	3	2	3.7
Black-fruited 2	0.06	2	9	2.9	2.1	3	3.7
Black-fruited 2	0.06	2	9	2.9	2.5	4	3.5
Black-fruited 2	0.06	2	7	3.2	2.6	3	3.4
Black-fruited 2	0.06	2	5	2.9	2.4	2	3.6
Black-fruited 2	0.06	2	7	3.1	2.1	3	3.7
White-fruited 1	0	3	15	5.3	4.9	2	1.9
White-fruited 1	0	3	8	4.9	4.5	2	2.5
White-fruited 1	0	3	9	5.1	4.2	3	2.8
White-fruited 1	0	3	12	5.3	4.1	2	2.5
White-fruited 1	0	3	10	4.9	4.5	2	2.1
White-fruited 1	0	3	9	4.2	3.9	3	2.9
White-fruited 1	0	3	10	4.1	4.2	1	3.2
White-fruited 1	0	3	9	4.4	4.1	2	3.5
White-fruited 1	0	3	7	4.1	4.2	2	3.1
White-fruited 1	0	3	9	3.9	3.6	2	2.5
White-fruited 1	0.02	3	15	3.9	3.9	3	3.3
White-fruited 1	0.02	3	14	3.8	3.4	3	2.5
White-fruited 1	0.02	3	8	3.4	3.2	4	2.9
White-fruited 1	0.02	3	9	3.5	3.1	2	3.4
White-fruited 1	0.02	3	8	4.1	3.9	3	2.6
White-fruited 1	0.02	3	9	4.2	4.1	3	2.5
White-fruited 1	0.02	3	8	3.9	3.5	3	3.5
White-fruited 1	0.02	3	9	3.5	3.4	4	3.5
White-fruited 1	0.02	3	8	3.5	3	3	3
White-fruited 1	0.02	3	7	3.9	3.5	4	2.9
White-fruited 1	0.04	3	8	3.7	3.2	3	3.2
White-fruited 1	0.04	3	7	3.5	3	4	2.7
White-fruited 1	0.04	3	9	3.4	3.1	4	3.1
White-fruited 1	0.04	3	9	3.5	3.2	3	2.9
White-fruited 1	0.04	3	8	3.3	2.8	4	2.7
White-fruited 1	0.04	3	7	3.4	3.1	5	3.8
White-fruited 1	0.04	3	5	3.1	2.5	3	3.5
White-fruited 1	0.04	3	4	3.2	3	3	3.1
White-fruited 1	0.04	3	6	3.1	2.4	4	2.7
White-fruited 1	0.04	3	5	3.5	3	4	3.6
White-fruited 1	0.06	3	4	3	3.1	3	3.5
White-fruited 1	0.06	3	7	3.1	2.5	5	3.5
White-fruited 1	0.06	3	7	2.9	2.2	3	3.5
White-fruited 1	0.06	3	4	3.5	3.4	4	3.1
White-fruited 1	0.06	3	4	3.5	3.3	3	3
White-fruited 1	0.06	3	4	2.9	3.1	4	2.5
White-fruited 1	0.06	3	3	2.7	2.9	4	3.1
White-fruited 1	0.06	3	4	2.5	2.1	5	3
White-fruited 1	0.06	3	5	2.5	2.4	5	2.9
White-fruited 1	0.06	3	5	2.7	2.6	5	3.6
White-fruited 2	0	3	9	5.2	4	2	2.8
White-fruited 2	0	3	11	4.4	4.1	3	2.8
White-fruited 2	0	3	12	4.7	4.2	1	2.8
White-fruited 2	0	3	10	4.1	3.8	2	2.4
White-fruited 2	0	3	7	4.5	3.9	2	2.6
White-fruited 2	0	3	14	4.6	4.1	2	2.5
White-fruited 2	0	3	10	4.5	3.8	1	2.9
White-fruited 2	0	3	13	4.4	3.7	2	2.1
White-fruited 2	0	3	9	4.1	4	1	2.4
White-fruited 2	0	3	10	3.9	3.5	2	2.1
White-fruited 2	0.02	3	9	4.1	3.6	2	3
White-fruited 2	0.02	3	9	3.9	3.8	4	2.5
White-fruited 2	0.02	3	8	3.5	3.2	2	2.4
White-fruited 2	0.02	3	12	3.6	3.5	3	2.6
White-fruited 2	0.02	3	7	3.7	3.2	4	2.5
White-fruited 2	0.02	3	8	4.5	4.2	3	2.1
White-fruited 2	0.02	3	11	4.6	4.1	4	3
White-fruited 2	0.02	3	8	4.4	3.4	4	3.7
White-fruited 2	0.02	3	8	3.2	3.1	3	3.1
White-fruited 2	0.02	3	7	3.5	3.4	3	2.9
White-fruited 2	0.04	3	8	3.1	2.4	4	3.1
White-fruited 2	0.04	3	7	3.5	3.2	3	3.5
White-fruited 2	0.04	3	10	3.6	3.1	4	3.2
White-fruited 2	0.04	3	8	3.1	2.5	4	2.5
White-fruited 2	0.04	3	7	3.6	2.6	4	3.1
White-fruited 2	0.04	3	6	3.1	2.5	3	3.5
White-fruited 2	0.04	3	7	2.9	3.1	3	3
White-fruited 2	0.04	3	6	3.2	2.4	3	3
White-fruited 2	0.04	3	5	2.9	2.5	3	2.7
White-fruited 2	0.04	3	7	3.1	2.9	4	2.9
White-fruited 2	0.06	3	6	2.5	2.4	5	3.2
White-fruited 2	0.06	3	7	3.1	2.1	3	3.9
White-fruited 2	0.06	3	8	3.2	2.4	3	3.7
White-fruited 2	0.06	3	4	3.6	2.5	3	3.5
White-fruited 2	0.06	3	5	2.9	2.8	4	3.9
White-fruited 2	0.06	3	4	3.8	3.5	3	3.8
White-fruited 2	0.06	3	4	3.1	2.5	4	2.9
White-fruited 2	0.06	3	3	2.8	2.6	5	3.1
White-fruited 2	0.06	3	3	2.7	2.4	5	3.5
White-fruited 2	0.06	3	5	2.8	2.1	4	3.9
Black-fruited 1	0	3	7	4.7	3.6	2	3
Black-fruited 1	0	3	11	5.6	5.1	3	2.8
Black-fruited 1	0	3	12	5.1	4.9	3	2.5
Black-fruited 1	0	3	16	5.2	4.1	1	2.5
Black-fruited 1	0	3	10	4.9	4.5	2	2.5
Black-fruited 1	0	3	11	4.1	3.9	1	3.1
Black-fruited 1	0	3	10	5.1	4.5	2	2.7
Black-fruited 1	0	3	11	4.9	4.1	1	3.5
Black-fruited 1	0	3	10	5.4	4.2	1	3.5
Black-fruited 1	0	3	12	4.9	4.3	2	2.5
Black-fruited 1	0.02	3	11	5.1	4.9	3	2.8
Black-fruited 1	0.02	3	9	4.9	4.5	2	3
Black-fruited 1	0.02	3	10	3.8	4.1	2	3.1
Black-fruited 1	0.02	3	11	3.4	3.2	3	3.3
Black-fruited 1	0.02	3	12	4.1	3.5	3	2.5
Black-fruited 1	0.02	3	10	3.5	3.2	4	2.4
Black-fruited 1	0.02	3	13	3.9	3.5	3	3.5
Black-fruited 1	0.02	3	12	3.5	3.1	4	3.7
Black-fruited 1	0.02	3	10	3.6	3.2	3	2.5
Black-fruited 1	0.02	3	8	3.5	3.1	4	3.5
Black-fruited 1	0.04	3	10	4	3.1	4	3.5
Black-fruited 1	0.04	3	8	3.3	3.1	5	3.3
Black-fruited 1	0.04	3	8	3.5	3.2	3	3.7
Black-fruited 1	0.04	3	7	3.6	3.1	5	3.1
Black-fruited 1	0.04	3	10	3.9	3.4	2	2.5
Black-fruited 1	0.04	3	7	3.7	3.5	3	3.1
Black-fruited 1	0.04	3	10	3.6	3.4	3	3.4
Black-fruited 1	0.04	3	8	3.5	2.4	4	3.5
Black-fruited 1	0.04	3	9	3.4	2.9	3	3.2
Black-fruited 1	0.04	3	8	3.2	2.7	3	3
Black-fruited 1	0.06	3	8	3.3	2.1	5	3.1
Black-fruited 1	0.06	3	7	3.7	3.5	4	3.7
Black-fruited 1	0.06	3	4	3.8	3.1	5	2.9
Black-fruited 1	0.06	3	7	3.1	2.1	5	3.5
Black-fruited 1	0.06	3	5	3.5	3	4	3.6
Black-fruited 1	0.06	3	6	3.4	2.7	3	3.3
Black-fruited 1	0.06	3	7	3.1	2.9	3	3.9
Black-fruited 1	0.06	3	6	2.9	2.4	4	4.2
Black-fruited 1	0.06	3	5	3.1	3	3	3.9
Black-fruited 1	0.06	3	5	3.1	2.7	5	3.7
Black-fruited 2	0	3	9	4.4	4.1	1	2.5
Black-fruited 2	0	3	10	4.6	4.2	3	2.9
Black-fruited 2	0	3	12	4.5	3.4	2	3.1
Black-fruited 2	0	3	13	4.4	4	1	2.5
Black-fruited 2	0	3	9	4.9	4.1	3	2.2
Black-fruited 2	0	3	9	4.1	3.5	1	2.1
Black-fruited 2	0	3	10	4.2	3.6	1	2.9
Black-fruited 2	0	3	10	4.3	3.4	1	3.2
Black-fruited 2	0	3	15	4.5	3.6	1	2.9
Black-fruited 2	0	3	12	4.9	4.1	2	2.5
Black-fruited 2	0.02	3	10	5.6	3.5	3	2.9
Black-fruited 2	0.02	3	9	3.9	3.2	2	2.5
Black-fruited 2	0.02	3	9	4.1	3.5	4	2.6
Black-fruited 2	0.02	3	8	4.2	3.7	3	2.9
Black-fruited 2	0.02	3	8	3.5	3.2	2	2.5
Black-fruited 2	0.02	3	10	3.9	3.1	2	2.5
Black-fruited 2	0.02	3	7	3.6	3.2	4	3
Black-fruited 2	0.02	3	13	3.5	2.9	3	3.5
Black-fruited 2	0.02	3	11	4.5	3.7	4	3.5
Black-fruited 2	0.02	3	12	4.5	3.9	2	3.5
Black-fruited 2	0.04	3	9	3.9	3.9	3	3.2
Black-fruited 2	0.04	3	10	4.1	3.5	5	3.5
Black-fruited 2	0.04	3	8	4	3.4	3	3.3
Black-fruited 2	0.04	3	9	3.8	3.2	4	3
Black-fruited 2	0.04	3	7	3.5	3.1	3	3.7
Black-fruited 2	0.04	3	10	3.4	3.2	3	3.1
Black-fruited 2	0.04	3	8	3.9	3.1	4	3.2
Black-fruited 2	0.04	3	9	3.5	3.2	4	3.5
Black-fruited 2	0.04	3	9	3.6	3.1	5	3.6
Black-fruited 2	0.04	3	8	3.5	2.9	4	3.5
Black-fruited 2	0.06	3	6	2.9	2.1	5	3.5
Black-fruited 2	0.06	3	5	3.5	2.9	3	3.5
Black-fruited 2	0.06	3	7	3.6	2.2	4	4.2
Black-fruited 2	0.06	3	6	3.7	2.9	6	3.9
Black-fruited 2	0.06	3	5	3.6	2.8	3	3.7
Black-fruited 2	0.06	3	8	3.1	2.5	4	3.9
Black-fruited 2	0.06	3	4	3.2	2.5	5	3.8
Black-fruited 2	0.06	3	6	3.1	2.9	4	3.5
Black-fruited 2	0.06	3	6	3.5	2.8	3	3.9
Black-fruited 2	0.06	3	5	2.9	2.4	5	4.2
